# Supplementary material
Source: ML conference proceedings conference paper supplement (https://openreview.net/forum?id=BvRiMrnuFC)
Supplement: supplementary_material [file attachment]

---

# Bayesian Optimization over Bounded Domains with the Beta Product Kernel (Supplementary Material)

---

Table S1: Training details of different models.

| Model      | Training Steps | Batch Size | Time per Evaluation | Num of Training Samples |
|------------|----------------|------------|---------------------|-------------------------|
| GPT-2      | 512            | 25         | 55 mins             | 12,800                  |
| BERT       | 256            | 100        | 40 mins             | 25,600                  |
| DeBERTa-v3 | 256            | 100        | 30 mins             | 25,600                  |
| ViT        | 1 epoch        | 200        | 7 mins              | Full training set       |

## A UPPER BOUND OF $K_\beta(\mathbf{x}, \mathbf{x})$

### A.1 PROOF OF LEMMA 1

**Lemma 1.** For gamma function  $\Gamma(\cdot)$ , we have that

$$\frac{\Gamma(2x+1)}{\Gamma^2(x+1)} = \frac{2^{2x}\Gamma(x+\frac{1}{2})}{\sqrt{\pi}\Gamma(x+1)} \quad (1)$$

*Proof.* We start by utilizing the duplication formula for the Gamma function, which states:

$$\Gamma(z)\Gamma\left(z+\frac{1}{2}\right) = 2^{1-2z}\sqrt{\pi}\Gamma(2z)$$

Applying the duplication formula to our specific case by setting  $z = x + \frac{1}{2}$ , we get:

$$\Gamma\left(x+\frac{1}{2}\right)\Gamma(x+1) = 2^{-2x}\sqrt{\pi}\Gamma(2x+1).$$

Dividing both sides by  $\Gamma^2(x+1)$ , we obtain:

$$\frac{\Gamma(2x+1)}{\Gamma^2(x+1)} = \frac{2^{2x}\Gamma\left(x+\frac{1}{2}\right)}{\sqrt{\pi}\Gamma(x+1)}.$$

which completes the proof. □

## A.2 PROOF OF LEMMA 2

**Lemma 2.** For  $x \geq 0$  and  $0 < s < 1$ , it holds that:

$$\left(\frac{2}{2x+1}\right)^{\frac{1}{2}} \leq \frac{\Gamma(x+\frac{1}{2})}{\Gamma(x+1)} \leq 2.$$

*Proof.* The Wendel's inequality is stated as

$$\left(\frac{z}{z+s}\right)^{1-s} \leq \frac{1}{z^s} \cdot \frac{\Gamma(z+s)}{\Gamma(z)} \leq 1, \quad (2)$$

where  $z > 0$  and  $s \in (0, 1)$ . When  $s = \frac{1}{2}$ , it is equivalent to

$$1 \leq z^{\frac{1}{2}} \frac{\Gamma(z)}{\Gamma(z+\frac{1}{2})} \leq \left(\frac{z+\frac{1}{2}}{z}\right)^{\frac{1}{2}} \quad (3)$$

$$z^{-\frac{1}{2}} \leq \frac{\Gamma(z)}{\Gamma(z+\frac{1}{2})} \leq z^{-\frac{1}{2}} \left(\frac{1}{2z} + 1\right)^{\frac{1}{2}}. \quad (4)$$

Apply the inequality with  $z = x + \frac{1}{2}$  and  $s = \frac{1}{2}$ , we have that

$$\left(\frac{2}{2x+1}\right)^{\frac{1}{2}} \leq \frac{\Gamma(x+\frac{1}{2})}{\Gamma(x+1)} \leq \left(x+\frac{1}{2}\right)^{-\frac{1}{2}} \left(\frac{1}{2x+1} + 1\right)^{\frac{1}{2}} \quad (5)$$

$$= \left[\frac{2}{2x+1} \left(\frac{1}{2x+1} + 1\right)\right]^{\frac{1}{2}} =: g(x). \quad (6)$$

As  $g(x)$  is a decreasing function on  $[0, \infty)$ , thus  $g(0) = \max_{x \geq 0} g(x) = 2$ , which concludes the proof.  $\square$

## A.3 PROOF OF PROPOSITION 1

**Proposition 2.**  $K_\beta(\mathbf{x}, \mathbf{x}) = \mathcal{O}(2^{2d-\frac{2d}{h}} h^{-\frac{3d}{2}}), \forall \mathbf{x} \in [0, 1]^d$ .

*Proof.* For any  $\mathbf{x} = (x_1, \dots, x_d) \in [0, 1]^d$ ,  $K_\beta(\mathbf{x}, \mathbf{x})$  is expressed as

$$K_\beta(\mathbf{x}, \mathbf{x}) = C \prod_{i=1}^d \frac{\Gamma(2\frac{x_i}{h_i} + 1) \Gamma(2\frac{1-x_i}{h_i} + 1)}{\Gamma^2(\frac{x_i}{h_i} + 1) \Gamma^2(\frac{1-x_i}{h_i} + 1)},$$

where

$$C = \frac{\Gamma^2(\frac{1}{h_i} + 2)}{\Gamma(\frac{2}{h_i} + 2)}. \quad (7)$$

By utilizing Lemma 1 with  $\frac{x_i}{h_i}$  and  $\frac{1-x_i}{h_i}$ , we have that

$$K_\beta(\mathbf{x}, \mathbf{x}) = C \prod_{i=1}^d \frac{2^{2\frac{x_i}{h_i} + 2(1-\frac{x_i}{h_i})} \Gamma(\frac{x_i}{h_i} + \frac{1}{2}) \Gamma(\frac{1-x_i}{h_i} + \frac{1}{2})}{\pi \Gamma(\frac{x_i}{h_i} + 1) \Gamma(\frac{1-x_i}{h_i} + 1)} \quad (8)$$

$$= C \prod_{i=1}^d \frac{4}{\pi} \frac{\Gamma(\frac{x_i}{h_i} + \frac{1}{2}) \Gamma(\frac{1-x_i}{h_i} + \frac{1}{2})}{\Gamma(\frac{x_i}{h_i} + 1) \Gamma(\frac{1-x_i}{h_i} + 1)} \quad (9)$$

When applying Lemma 2, we have that

$$\frac{\Gamma(\frac{x_i}{h_i} + \frac{1}{2}) \Gamma(\frac{1-x_i}{h_i} + \frac{1}{2})}{\Gamma(\frac{x_i}{h_i} + 1) \Gamma(\frac{1-x_i}{h_i} + 1)} \leq 4 \quad (10)$$

Therefore, we can derive that

$$K_\beta(\mathbf{x}, \mathbf{x}) \leq \frac{16^d}{\pi^d} \prod_{i=1}^d \frac{\Gamma^2(\frac{1}{h_i} + 2)}{\Gamma(\frac{2}{h_i} + 2)} \quad (11)$$

$$= \frac{16^d}{\pi^d} \prod_{i=1}^d \frac{(\frac{2}{h_i} + 2)\Gamma^2(\frac{1}{h_i} + 2)}{\Gamma(\frac{2}{h_i} + 2 + 1)} \quad \text{by } \Gamma(x+1) = x\Gamma(x) \quad (12)$$

$$= \frac{16^d}{\pi^d} \prod_{i=1}^d \frac{(\frac{2}{h_i} + 2)\sqrt{\pi}\Gamma(\frac{1}{h_i} + 2)}{2^{2(\frac{1}{h_i} + 1)}\Gamma(\frac{1}{h_i} + \frac{3}{2})} \quad \text{by Lemma 1 with } x = \frac{1}{h_i} + 1 \quad (13)$$

$$= \frac{2^{2d}}{\pi^{\frac{d}{2}}} \prod_{i=1}^d \frac{(\frac{2}{h_i} + 2)\Gamma(\frac{1}{h_i} + 2)}{2^{\frac{2}{h_i}}\Gamma(\frac{1}{h_i} + \frac{3}{2})} \quad (14)$$

$$\leq \frac{2^{3d}}{\pi^{\frac{d}{2}}} \prod_{i=1}^d \frac{(\frac{1}{h_i} + 1)(\frac{1}{h_i} + \frac{3}{2})^{\frac{1}{2}}}{2^{\frac{2}{h_i}}} \quad \text{by Lemma 2 } \frac{\Gamma(\frac{1}{h_i} + 2)}{\Gamma(\frac{1}{h_i} + \frac{3}{2})} \leq \left(\frac{1}{h_i} + \frac{3}{2}\right)^{\frac{1}{2}} \quad (15)$$

$$= 2^{3d - \frac{2d}{h}} \left(\frac{1}{h} + 1\right)^d \left(\frac{1}{h\pi} + \frac{3}{2\pi}\right)^{\frac{d}{2}} \quad (16)$$

Therefore, we conclude the proof.  $\square$
